# Supplementary material for: Strong, Tough, and Adhesive Polyampholyte/Natural Fiber Composite Hydrogels
Source: MDPI journal article supplement (doi:10.3390/polym14224984), 2022-11-17
Supplement: s1 [file s1]

# Supplementary Material: Strong, Tough, and Adhesive Polyampholyte/ Natural Fiber Composite Hydrogels

Yongqi Yan, Longya Xiao, Qin Teng, Yuanyuan Jiang, Qin Deng, Xuefeng Li and Yiwan Huang

## S1. Supplementary Methods

### S1.1. Fourier Transform Infrared Spectroscopy (FTIR)

FTIR spectra of the hydrogel samples were recorded by using a Tensor 2 FTIR spectrometer (NeXus, USA). The measured specimens were prepared by the KBr-disk method, and the spectra in the wavenumber range of  $4000\text{--}400\text{ cm}^{-1}$  were collected with a resolution of  $4\text{ cm}^{-1}$ . All the experiments were carried out at ambient temperature.

### S1.2. Field Emission Scanning Electron Microscopy (FESEM)

Fracture morphologies of the hydrogel samples were observed by a Hitachi SU8010 FESEM. In detail, the samples were frozen and fractured in liquid nitrogen and then freeze-dried for 24 hours. Afterwards, the fractured surfaces of the samples were gold-coated in a JUC-500 Magnetron Sputtering Device (JEOL, Tokyo, Japan), and then observed with an accelerating voltage of 5 kV.

## S2. Supplementary Figures

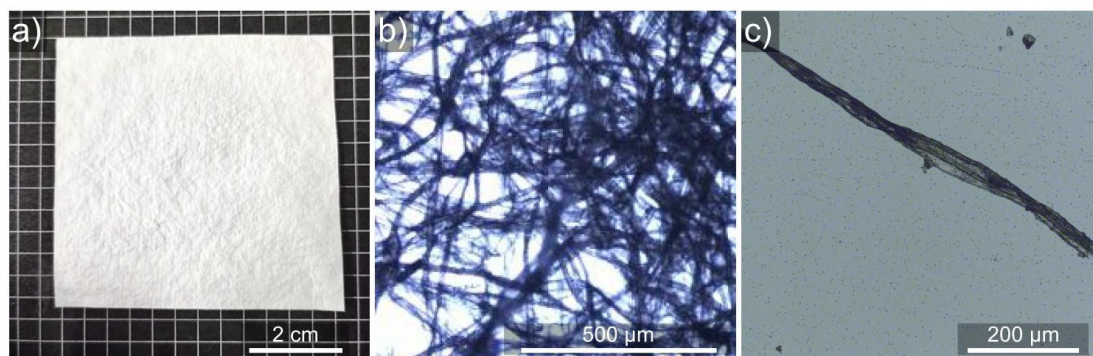

**Figure S1.** Macroscopic and microscopic images of cellulose-based fiber fabric (CF) sheet used in this work. (a) Macroscopic photograph of the dried CF sheet. (b,c) Optical microscopic photographs of the CF sheet (b) and a single fiber (c). Geometry information of the single fiber: 20–50  $\mu\text{m}$  in diameter and 1.5–2 mm in length.

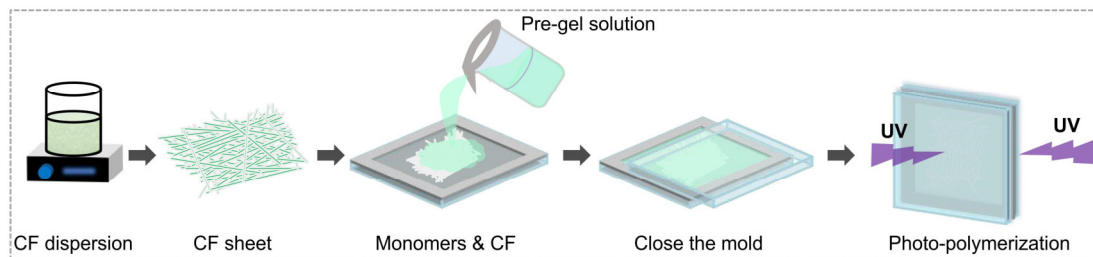

**Figure S2.** Fabrication process of PA/CF composite hydrogels.

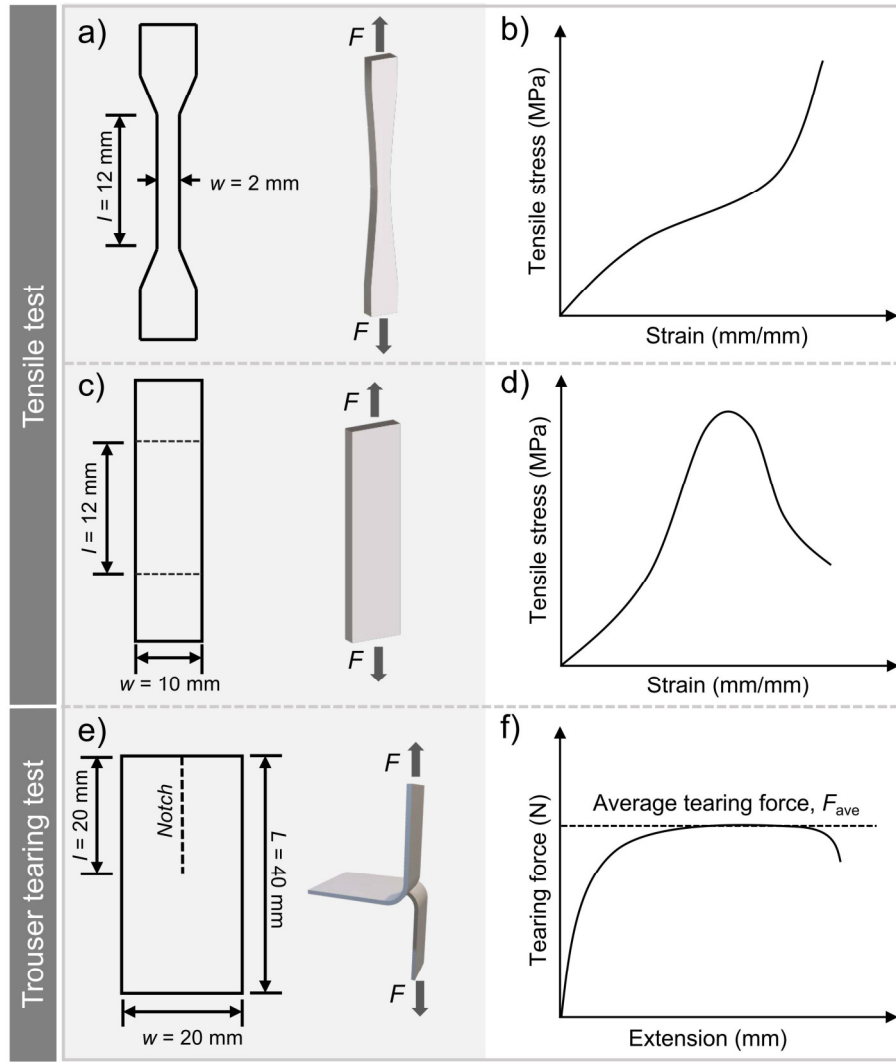

**Figure S3.** Sample geometries and methods for tensile and tearing tests. (a,b) Geometry and a representative stress-strain curve of PA gel in tensile tests. (c,d) Geometry and a representative stress-strain curve of PA/CF composite gels in tensile tests. (e,f) Geometry and a representative tearing force-extension curve of PA/CF composite gels in tearing tests. Average force ( $F_{ave}$ ) obtained from the curve is used for calculation of tearing energy according to the literatures.

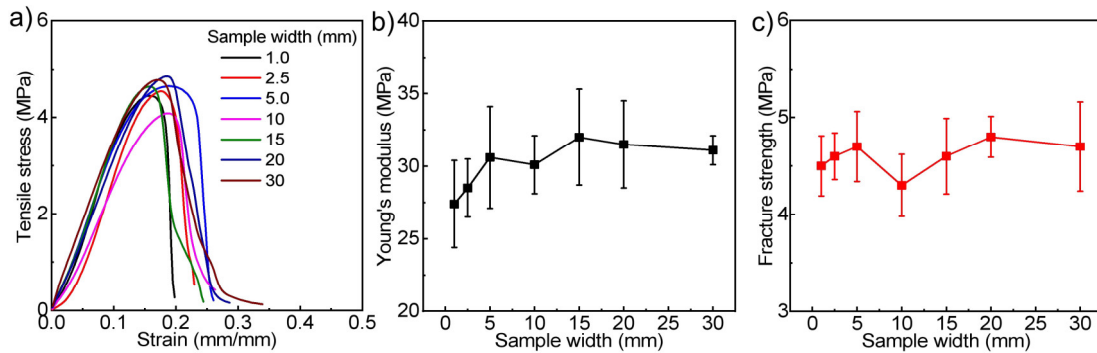

**Figure S4.** Mechanical properties of PA/CF composite hydrogels with different sample widths.  $\phi_{CF} = 6.0$  wt%. (a) Stress-strain curves. (b) Young's modulus. (c) Tensile fracture strength. Due to the geometrical effect, the composite gel could achieve relatively constant mechanical properties after sample width  $w > 5$  mm.

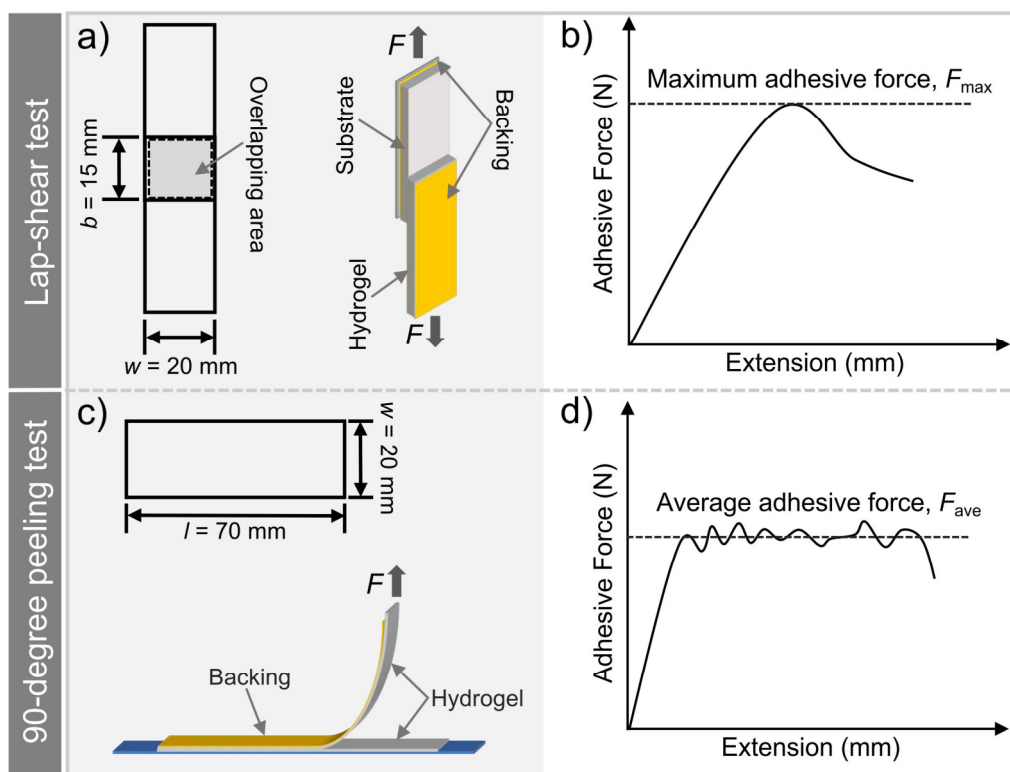

**Figure S5.** Sample geometries and methods for adhesion tests. (a,b) Geometry and a representative adhesive force-extension curve of PA/CF composite hydrogels in lap-shear tests. Maximum adhesive force ( $F_{\max}$ ) obtained from the curve is used for calculation of adhesive strength. (c,d) Geometry and a representative adhesive force-extension curve of PA/CF composite hydrogels in 90-degree peeling tests. Average adhesive force ( $F_{\text{ave}}$ ) obtained from the curve is used for calculation of adhesive energy according to the literatures.

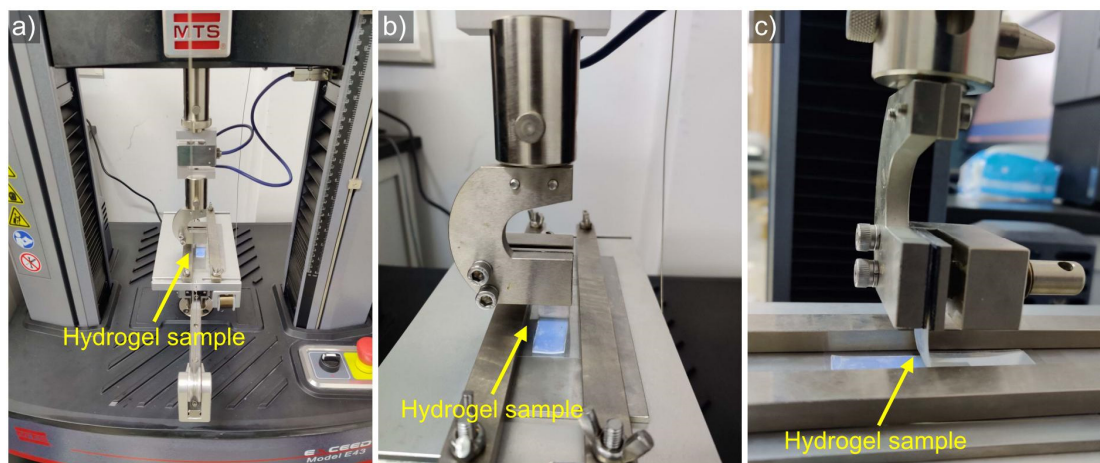

**Figure S6.** Photographs of 90-degree peeling tests for PA hydrogel and PA/CF composite hydrogels.

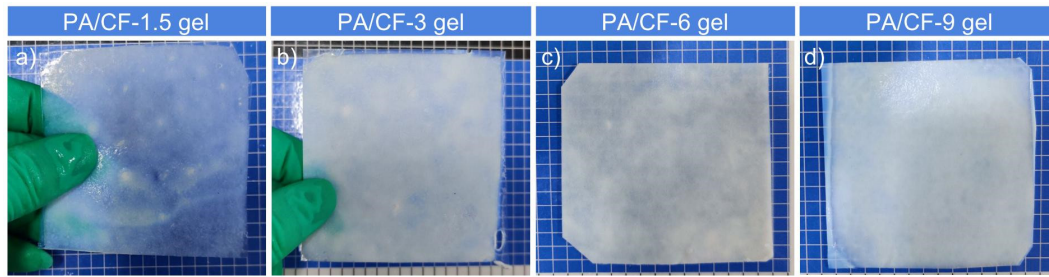

**Figure S7.** Macroscopic photographs of PA/CF composite hydrogels.

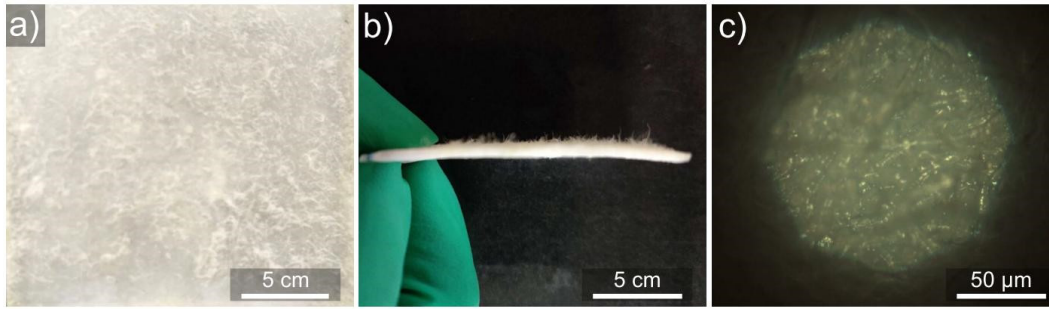

**Figure S8.** Failure surface of two pieces of PA/CF composite hydrogels after the lap-shear test.  $\phi_{CF} = 6.0$  wt%. (a,b) Macroscopic photographs in two directions. (c) Optical microscopic photograph.

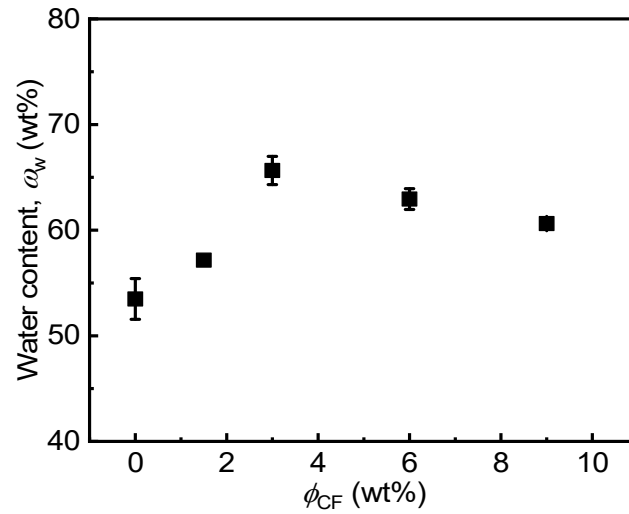

**Figure S9.** Water content ( $w_w$ ) versus  $\phi_{CF}$  for PA/CF composite hydrogels.

### S3. Supplementary Tables

**Table S1.** Summary of tensile properties of PA/CF composite hydrogels with different sample widths (shown in **Figure S4**).

| Sample width (mm) | $E$ (MPa)  | $\sigma_b$ (MPa) | $W_b$ (MJ m <sup>-3</sup> ) |
|-------------------|------------|------------------|-----------------------------|
| 1.0               | 27.4 ± 3.0 | 4.5 ± 0.3        | 0.53 ± 0.05                 |
| 2.5               | 28.5 ± 2.0 | 4.6 ± 0.2        | 0.67 ± 0.06                 |
| 5.0               | 30.6 ± 3.5 | 4.7 ± 0.4        | 0.79 ± 0.07                 |
| 10                | 30.1 ± 2.0 | 4.3 ± 0.3        | 0.58 ± 0.04                 |
| 15                | 32.0 ± 3.3 | 4.6 ± 0.4        | 0.60 ± 0.03                 |
| 20                | 31.5 ± 3.0 | 4.8 ± 0.2        | 0.73 ± 0.05                 |
| 30                | 31.1 ± 1.0 | 4.7 ± 0.4        | 0.69 ± 0.06                 |

**Table S2.** Summary of tensile properties of representative hydrogel samples (shown in **Figure 1c,d,e**).

| Sample code ( $\phi$ ) <sup>a)</sup> | $E$ (MPa)      | $\sigma_b$ (MPa) | $W_b$ (MJ m <sup>-3</sup> ) |
|--------------------------------------|----------------|------------------|-----------------------------|
| Neat PA gel                          | $1.7 \pm 0.3$  | $2.0 \pm 0.2$    | $5.9 \pm 0.4$               |
| PA/CF- $\phi$ gel                    | $29.3 \pm 1.7$ | $4.3 \pm 0.4$    | $0.6 \pm 0.1$               |
| Neat CF sheet                        | $10.4 \pm 0.9$ | $0.3 \pm 0.1$    | $0.01 \pm 0.01$             |

<sup>a)</sup>  $\phi$  in the code of PA/CF- $\phi$  represents weight percentage of CF in the corresponding PA/CF composite hydrogel.

**Table S3.** Summary of adhesion strength of PA/CF-6 composite hydrogels to diverse substrates (shown in **Figure 8**).

| Substrates     | PA/CF-6 hydrogel | Glass        | Cu           | PET        |
|----------------|------------------|--------------|--------------|------------|
| $\tau_s$ (kPa) | $940 \pm 120$    | $404 \pm 60$ | $215 \pm 20$ | $25 \pm 5$ |
